# Supplementary material for: Ultrafast charge separation and charge stabilization in axially linked ‘tetrathiafulvalene–aluminum(iii) porphyrin–gold(iii) porphyrin’ reaction center mimics
Source: Royal Society of Chemistry journal article supplement (doi:10.1039/c5cp04818d), 2015-01-01
Supplement: c5cp04818d1.pdf [file c5cp04818d1.pdf]

## Supplementary Information

### Ultrafast charge separation and charge stabilization in vertically-linked 'tetrathiafulvalene - aluminum(III) porphyrin - gold(III) porphyrin' reaction center mimics

*Prashanth K. Poddutoori,<sup>a,\*</sup> Gary N. Lim,<sup>b</sup> Serguei Vassiliev,<sup>c</sup> Francis D'Souza,<sup>b,\*</sup>*

<sup>a</sup>Department of Chemistry, University of Prince Edward Island, 550 University Ave., Charlottetown, PE, C1A 4P3 Canada. <sup>b</sup>Department of Chemistry, University of North Texas, 1155 Union Circle, #305070, Denton, TX 76203-5017, USA. <sup>c</sup>Department of Biological Sciences, Brock University 500 Glenridge Ave., St.Catharines, ON, L2S 3A1, Canada.

Corresponding Authors: ppoddutoori@upei.ca, Francis.DSouza@unt.edu

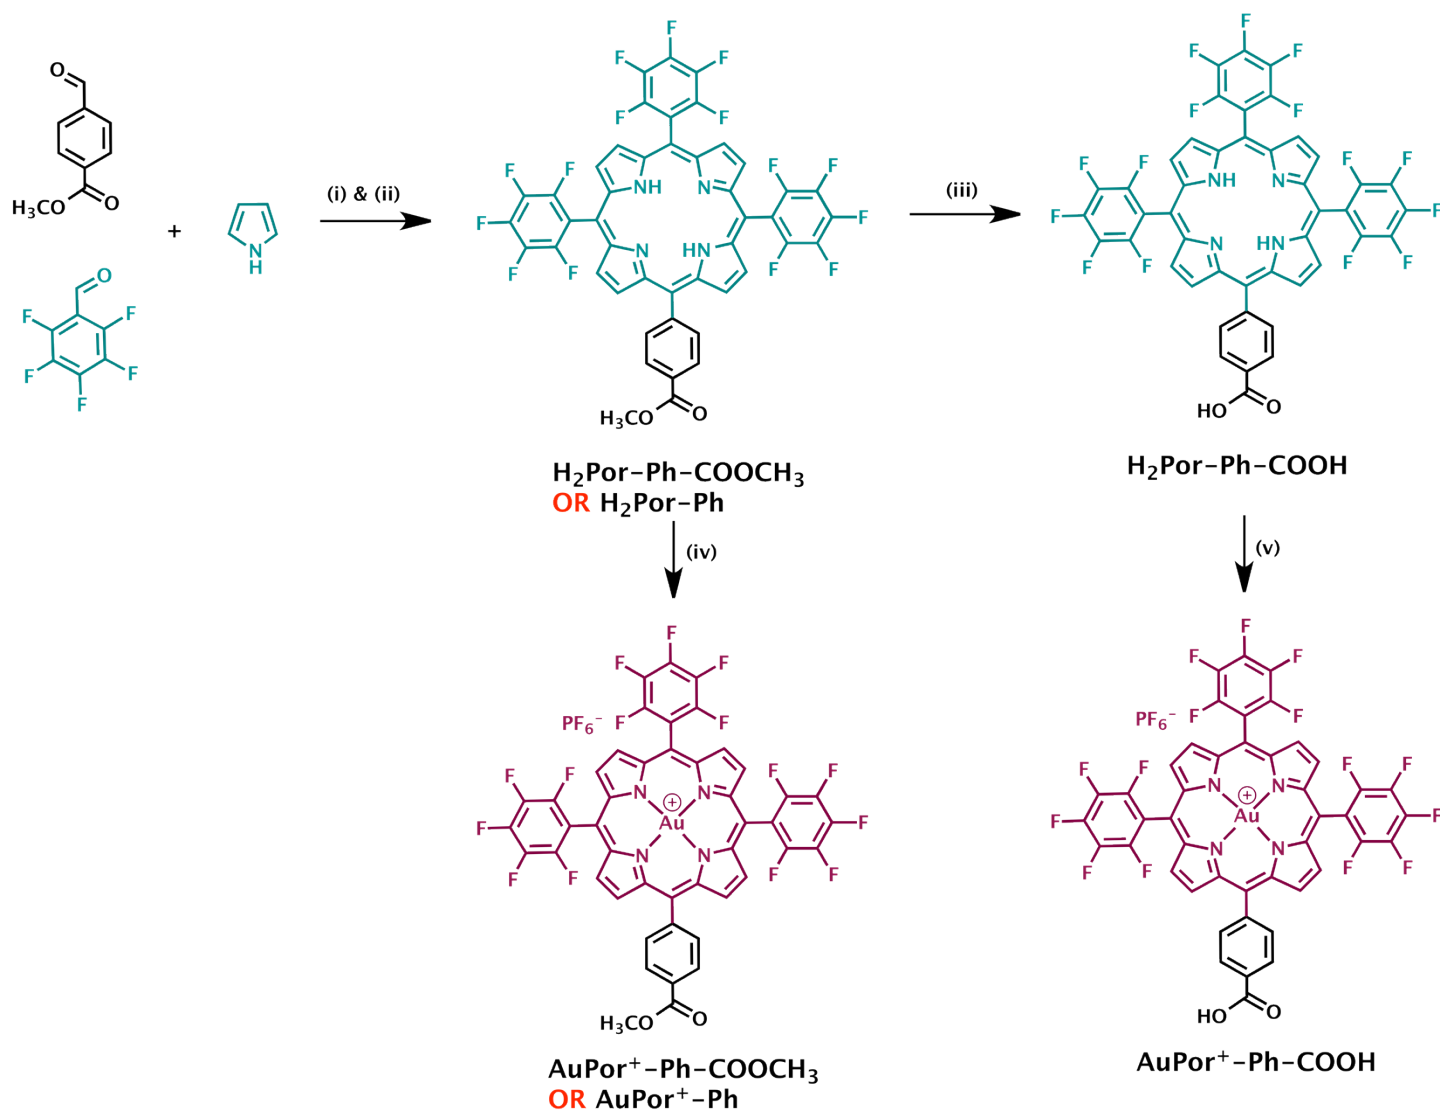

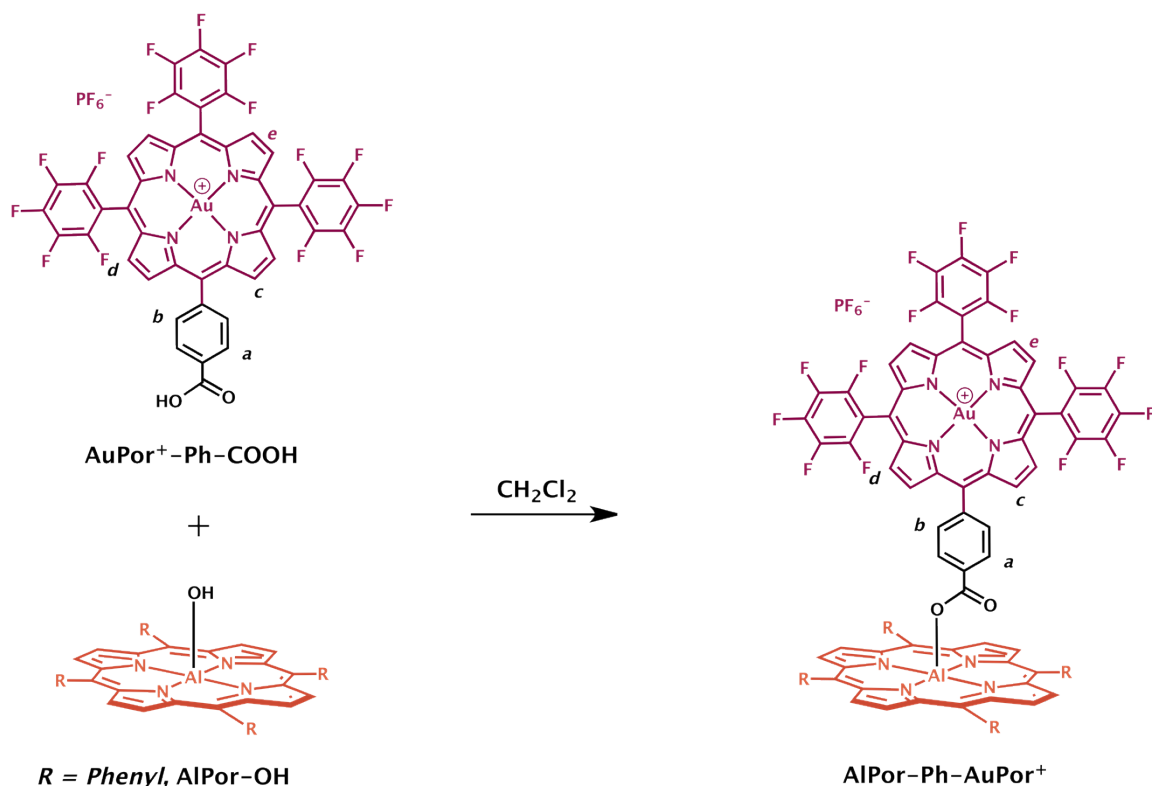

**Scheme S2.** Synthesis of the investigated dyad  $\text{AlPor-Ph-AuPor}^+$ . Reaction conditions: dichloromethane, 12 h, room temperature,  $\text{N}_2$ .

**Preparation of  $\text{AuPor-Ph-COOH.PF}_6$ :**  $\text{H}_2\text{Por-Ph-COOH}$  (75 mg, 0.081 mmol),  $\text{AuCl}_3$  (70 mg, 0.23 mmol) and  $\text{NaOAc}$  (260 mg, 3.23 mmol) were added to 10 mL of acetic acid. The resulting solution was refluxed for 16 h under nitrogen atmosphere. After reaction time, the reaction mixture was poured into water and extracted with dichloromethane. The collected organic layer was dried over  $\text{Na}_2\text{SO}_4$  and then the solvent was removed under vacuum. The obtained solid was dissolved in methanol and precipitated with aqueous saturated  $\text{NH}_4\text{PF}_6$ . The obtained precipitate was collected by filtration and air-dried. The crude product was purified by silicagel column chromatography using dichloromethane:methanol (90:10) as an eluent. **Yield: 20 mg (20%).** ESI MS:  $m/z$  1123.0444 for  $[\text{M-PF}_6]^+$ , calculated 1123.0459 for  $\text{C}_{45}\text{H}_{13}\text{AuF}_{15}\text{N}_4\text{O}_2$ .  $^1\text{H}$  NMR (300 MHz,  $\text{CD}_3\text{CN}$ ): 9.69 (s, 4H), 9.62 (s, 4H), 8.61 (d, 2H,  $J = 7.8$  Hz), 8.40 (d, 2H,  $J = 7.8$  Hz).  $^{31}\text{P}$  NMR (112 MHz,  $\text{CD}_3\text{CN}$ ): -143.38 (sep).  $^1\text{H}$  NMR ( $\text{CDCl}_3$ , 300 MHz): 9.52 (d, 2H,  $J = 5.32$  Hz), 9.47 (s, 4H), 9.39 (d, 2H,  $J = 5.32$  Hz), 8.54 (d, 2H,  $J = 8.0$  Hz), 8.25 (d, 2H,  $J = 8.0$  Hz).

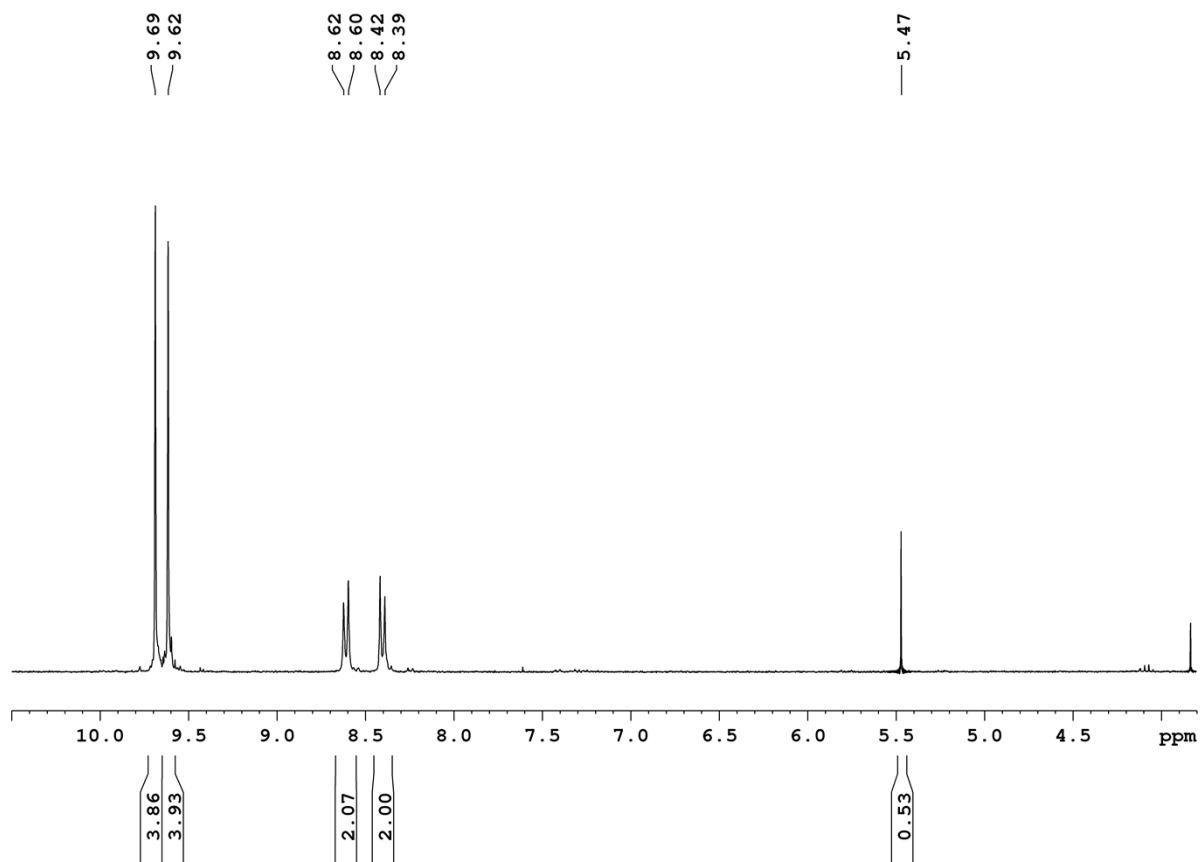

**Fig. S1**  $^1\text{H}$  NMR (300 MHz) spectrum of  $\text{AuPor-Ph-COOH.PF}_6$  in  $\text{CD}_3\text{CN}$ . Note that the peaks at 5.45 and 3.81 ppm are due to solvent impurities.

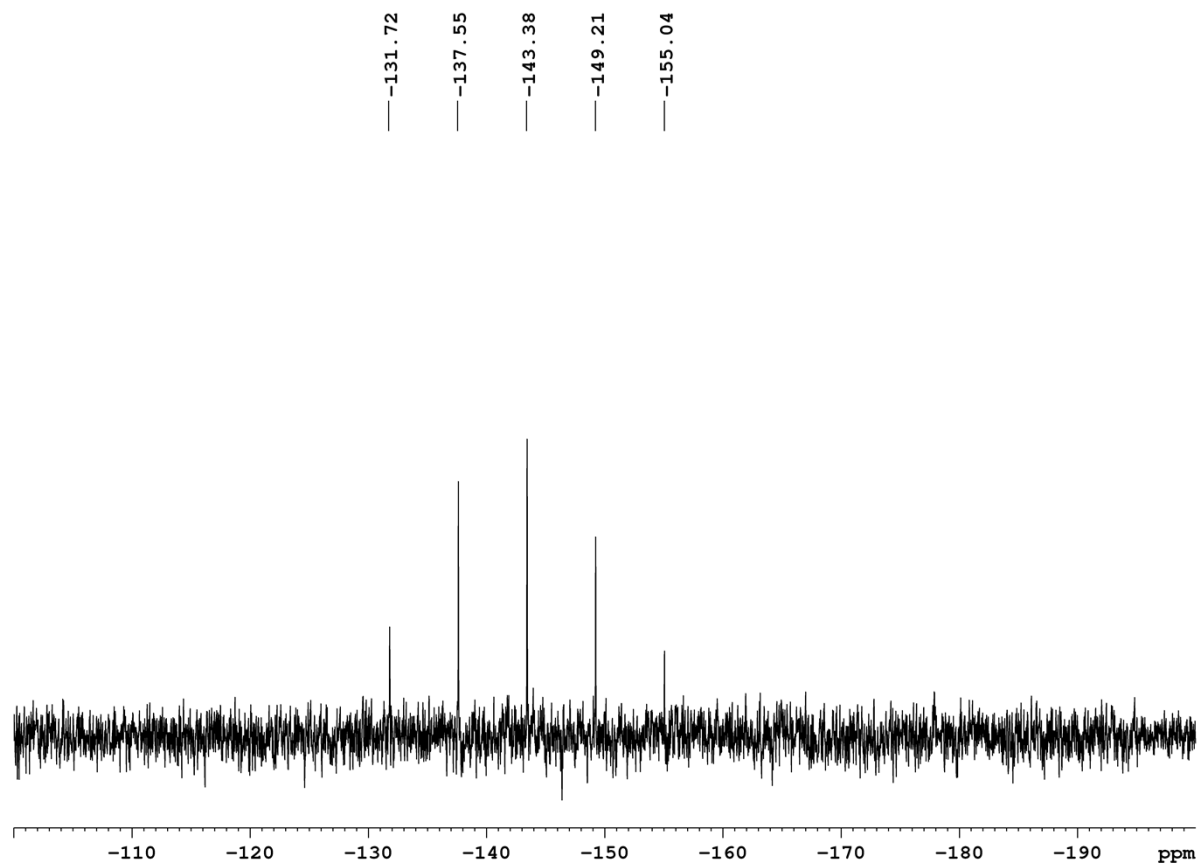

**Fig. S2**  $^{31}\text{P}$  NMR (121 MHz) spectrum of  $\text{AuPor-Ph-COOH.PF}_6$  in  $\text{CD}_3\text{CN}$

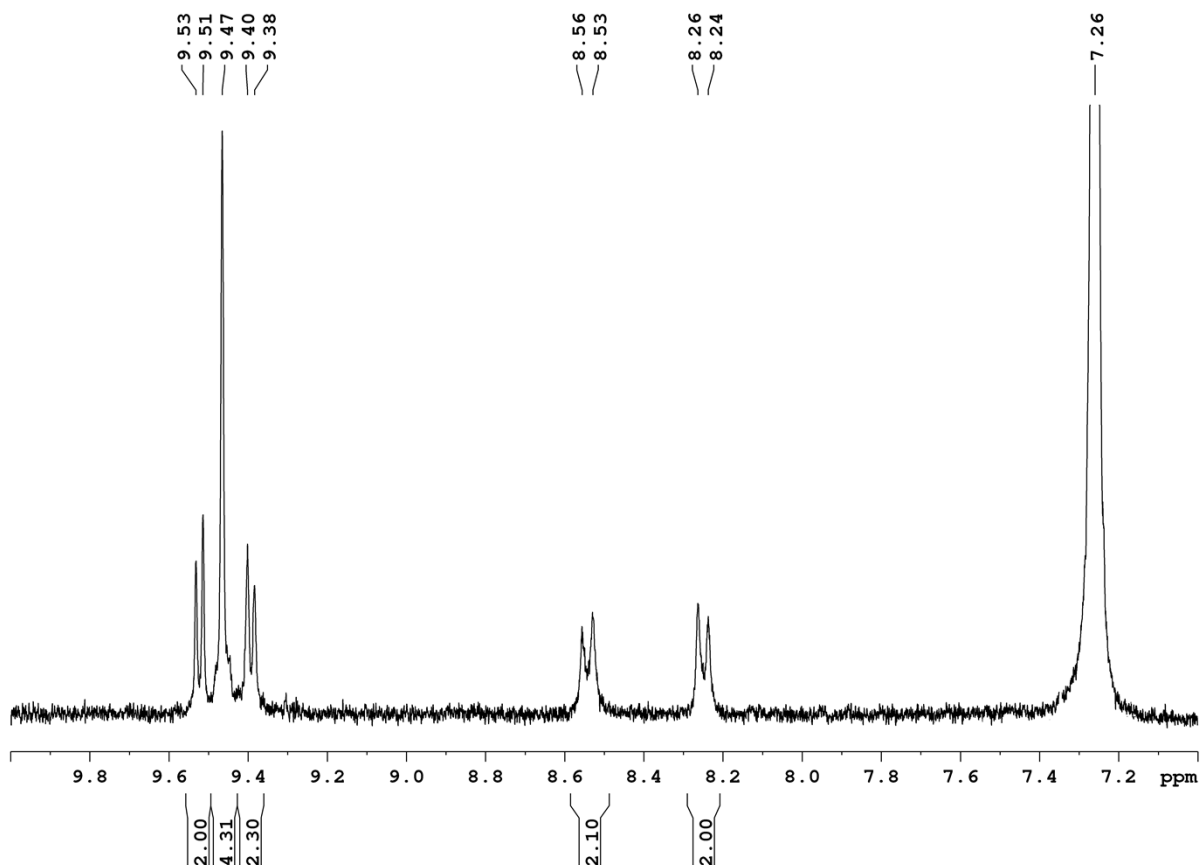

**Fig. S3**  $^1\text{H}$  NMR (300 MHz) spectrum of  $\text{AuPor-Ph-COOH.PF}_6$  in  $\text{CDCl}_3$ .

**Preparation of  $\text{AuPor-Ph-COOCH}_3.\text{PF}_6$ :**  $\text{H}_2\text{Por-Ph-COOCH}_3$  (100 mg, 0.11 mmol),  $\text{AuCl}_3$  (100 mg, 0.33 mmol) and  $\text{NaOAc}$  (300 mg, 3.65 mmol) were added to 10 mL of acetic acid. The resulting solution was refluxed for 16 h under nitrogen atmosphere. After reaction time, the reaction mixture was poured into water and extracted with dichloromethane. The collected organic layer was dried over  $\text{Na}_2\text{SO}_4$  and then the solvent was removed under vacuum. The obtained solid was dissolved in methanol and was precipitated with aqueous saturated  $\text{NH}_4\text{PF}_6$ . The obtained precipitate was collected and air dried. The crude product was purified by silicagel column chromatography using dichloromethane:methanol (90:10) as an eluent. Yield: 34 mg (25%). FAB MS:  $m/z$  1137.0607 for  $[\text{M-PF}_6]^+$ , calculated 1137.0616 for  $\text{C}_{46}\text{H}_{15}\text{AuF}_{15}\text{N}_4\text{O}_2$ .  $^1\text{H}$  NMR (300 MHz,  $\text{CD}_3\text{CN}$ ): 9.68 (s, 4H), 9.61 (d, 2H,  $J = 6.0$  Hz), 9.53 (d, 2H,  $J = 6.0$  Hz), 8.56 (d, 2H,  $J = 6.0$  Hz), 8.44 (d, 2H,  $J = 6.0$  Hz), 4.12 (s, 3H).

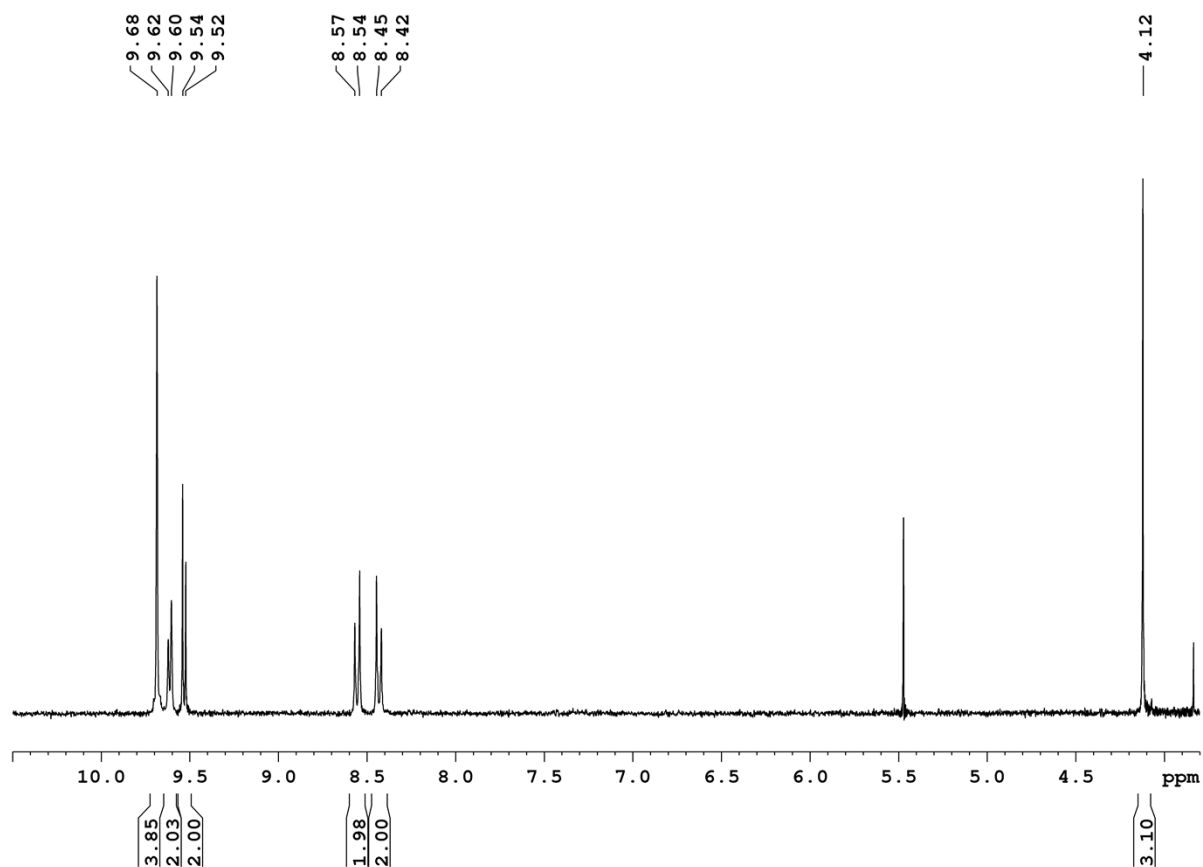

**Fig. S4**  $^1\text{H}$  NMR (300 MHz) spectrum of  $\text{AuPor-Ph-COOCH}_3\cdot\text{PF}_6$  in  $\text{CD}_3\text{CN}$ . Note that the peaks at 5.45 and 3.81 ppm are due to solvent impurities.

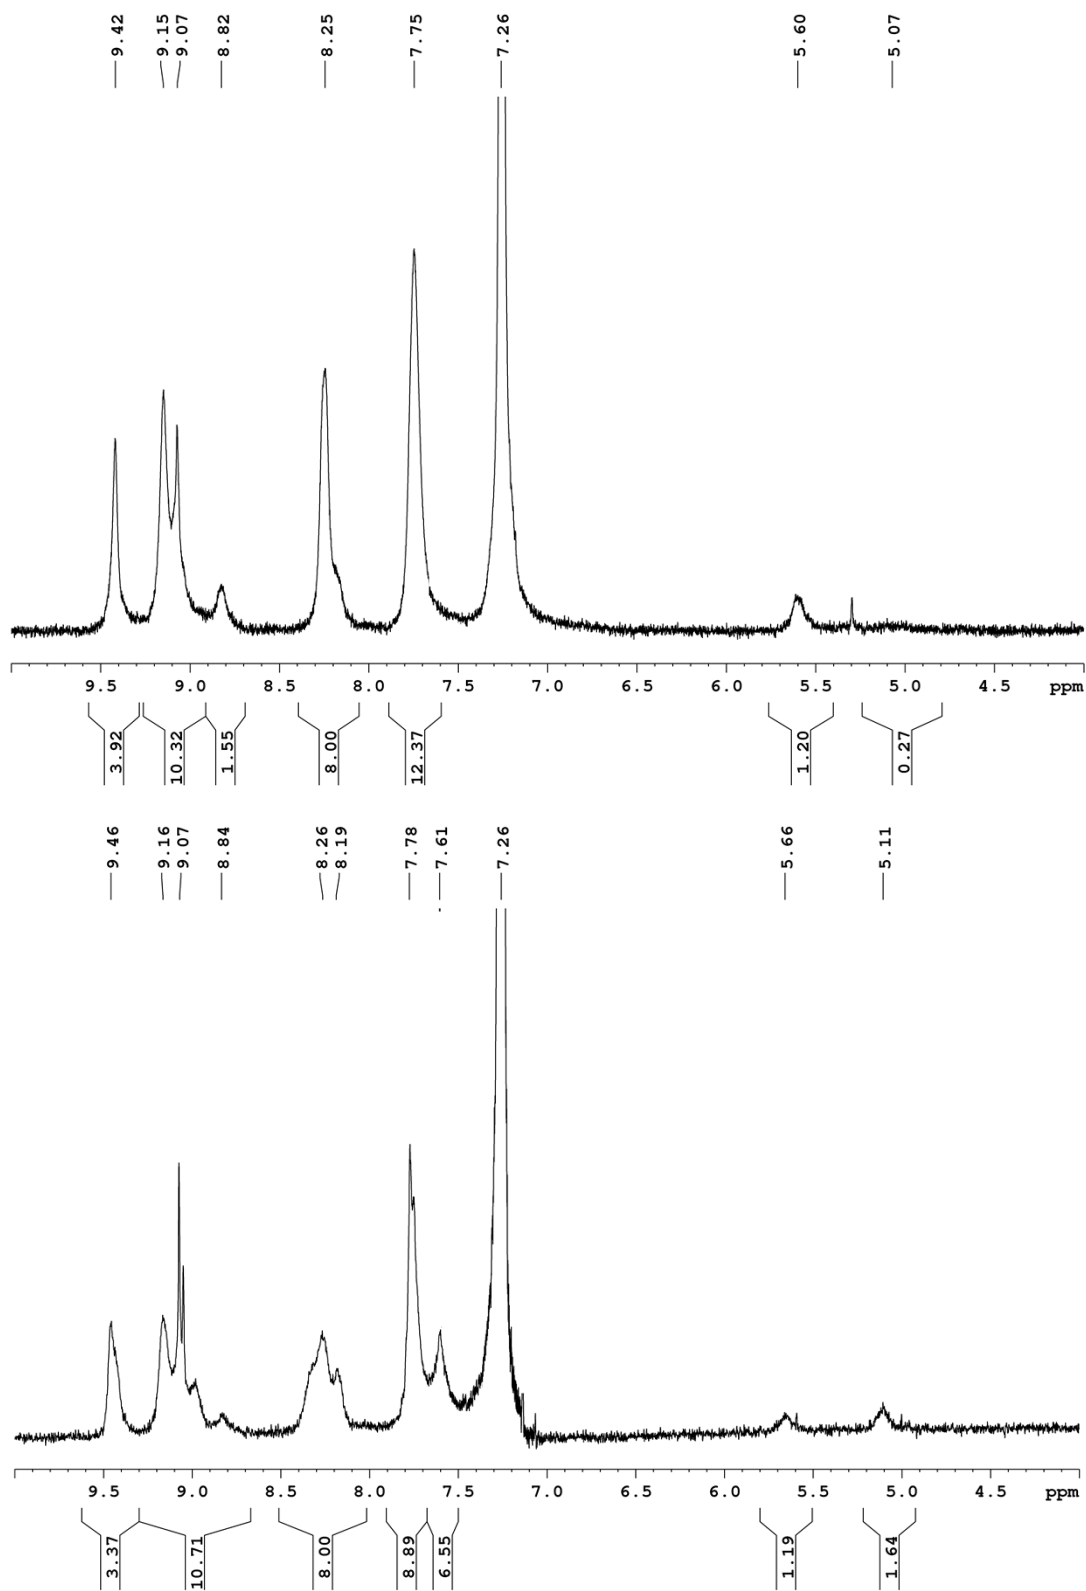

**Fig. S5**  $^1\text{H}$  NMR (300 MHz) spectra of AlPor-Ph-AuPor.PF<sub>6</sub> at ~1 mM (top) and ~2mM (bottom) concentrations in CDCl<sub>3</sub>.



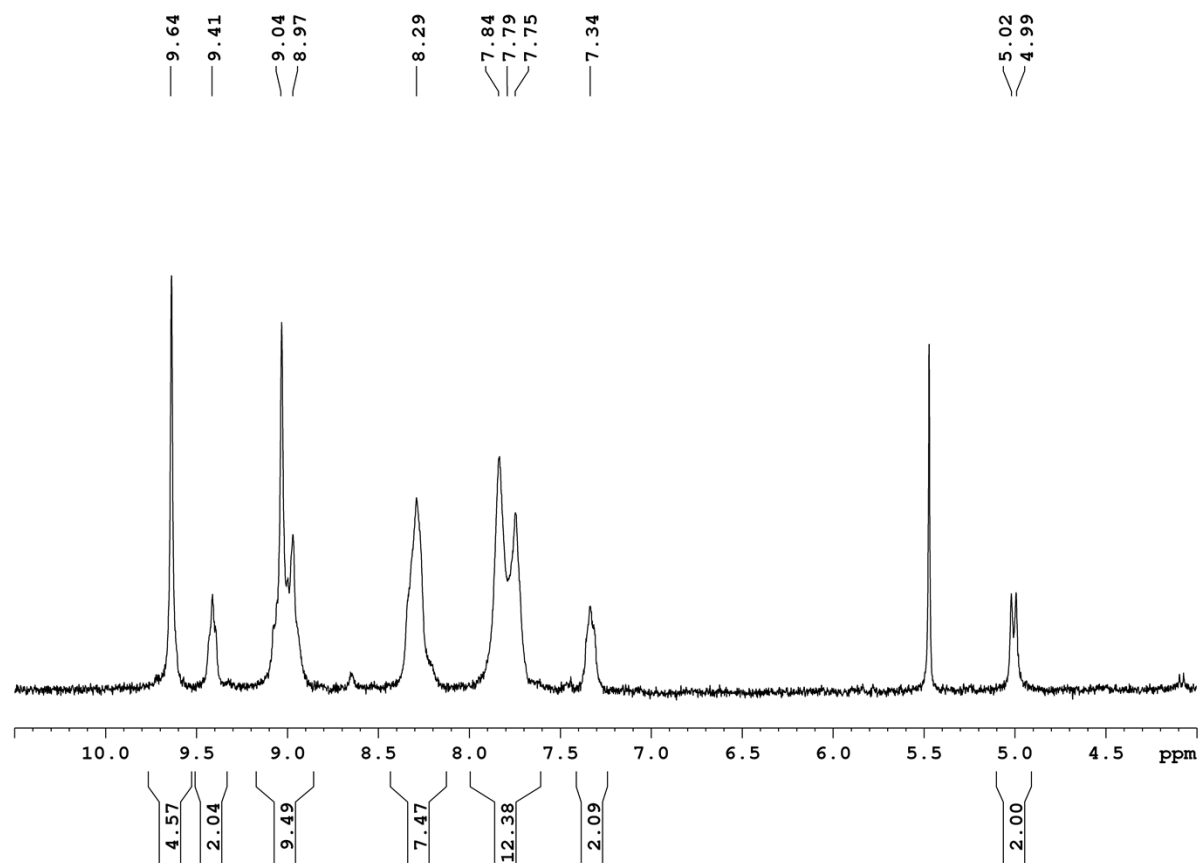

**Fig. S6**  $^1\text{H}$  NMR (300 MHz) spectrum of  $\text{AlPor-Ph-AuPor.PF}_6$  (~2 mM) in  $\text{CD}_3\text{CN}$ .

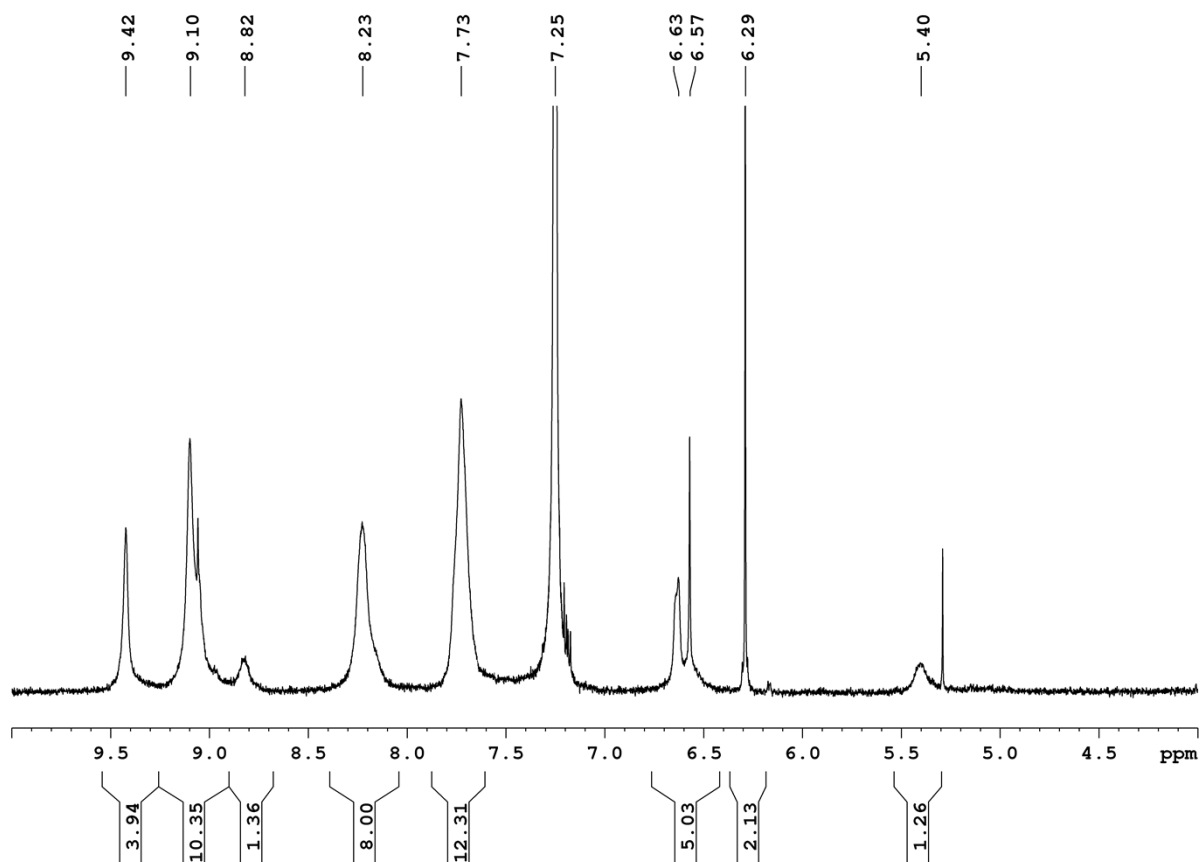

**Fig. S7**  $^1\text{H}$  NMR (300 MHz) spectrum of 1 mM TTF-py $\rightarrow$ AlPor-Ph-AuPor $^+$  in  $\text{CDCl}_3$ .

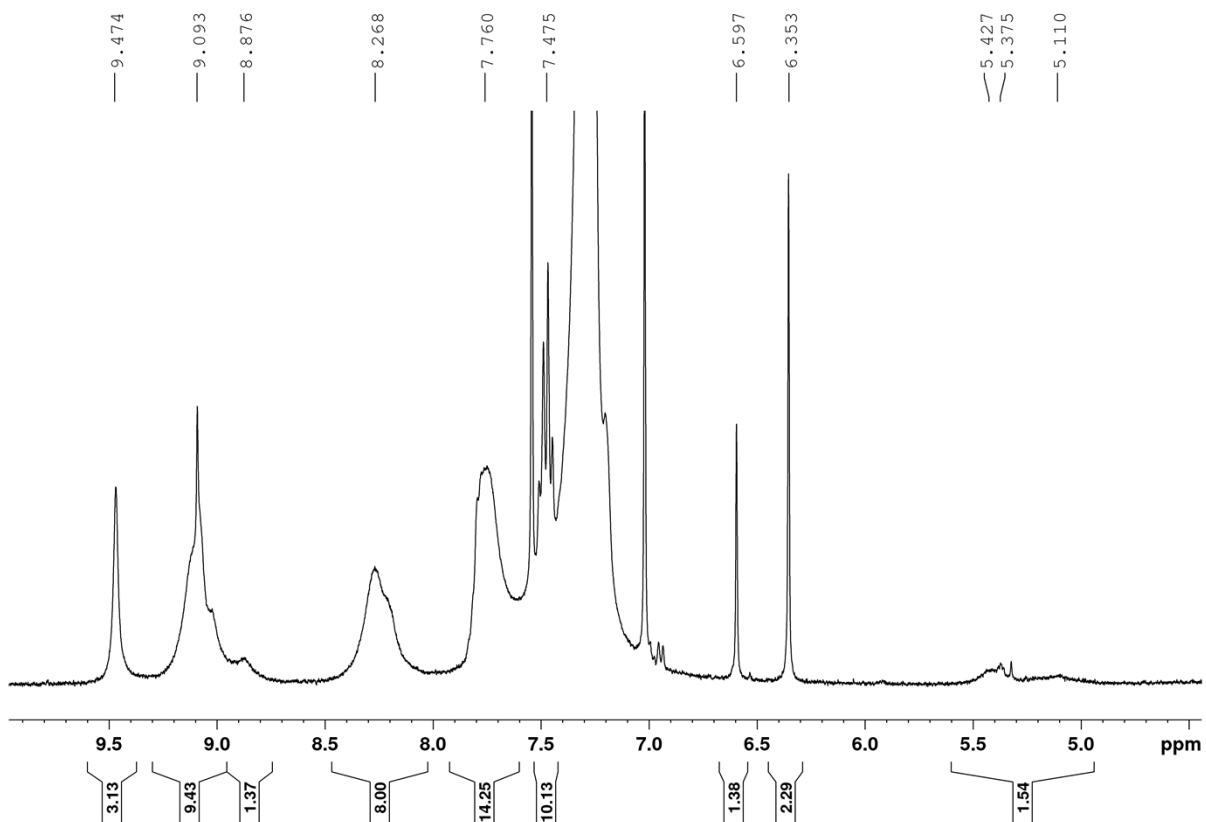

**Fig. S8**  $^1\text{H}$  NMR (400 MHz) spectrum of 0.6 mM TTF-Ph-py $\rightarrow$ AlPor-Ph-AuPor $^+$  in  $\text{CDCl}_3$ . Note that peaks at 7.55, 7.26 and 7.06 are due to the solvent.

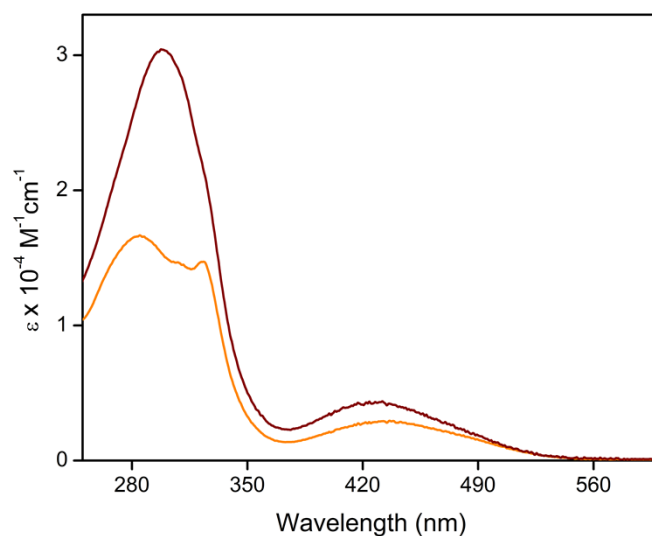

**Fig. S9** UV-visible absorption spectra of TTF-py (orange) and TTF-Ph-py (maroon) in dichloromethane.

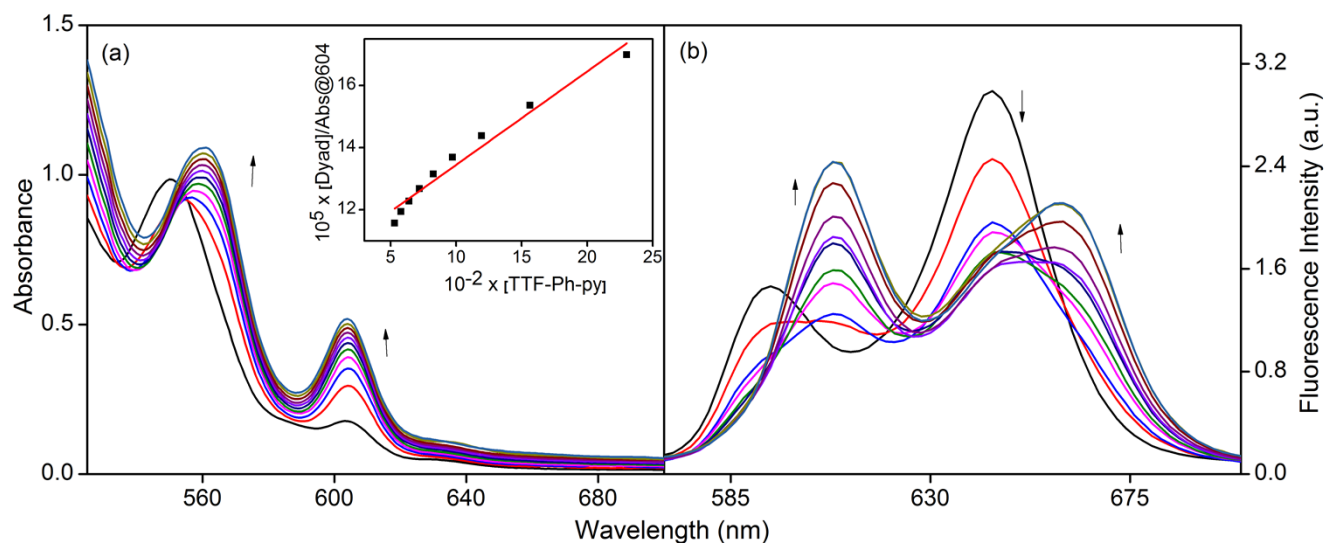

**Fig. S10** (a) Absorption titrations and (b) fluorescence titration of AlPor-Ph-AuPor<sup>+</sup> with TTF-Ph-py in dichloromethane. The inset shows the Benesi-Hildebrand plot of the change of absorbance at 603 nm. TTF-Ph-py was added up to  $1.88 \times 10^{-3}$  M in 20  $\mu$ L ( $2.22 \times 10^{-4}$  M) increments to 1 mL ( $6 \times 10^{-5}$  M) solution of dyad. The excitation wavelength was chosen at the isosbestic point, 555 nm, obtained from UV-visible titrations.

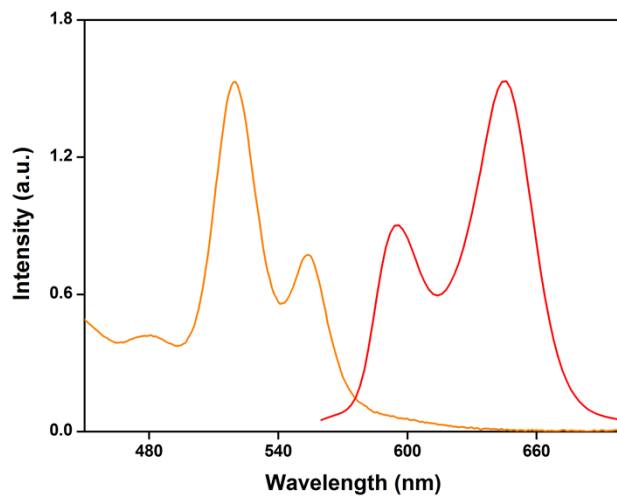

**Fig. S11** Spectral overlap between the AlPor emission (red) and AuPor<sup>+</sup> absorption (orange) spectra in dichloromethane.

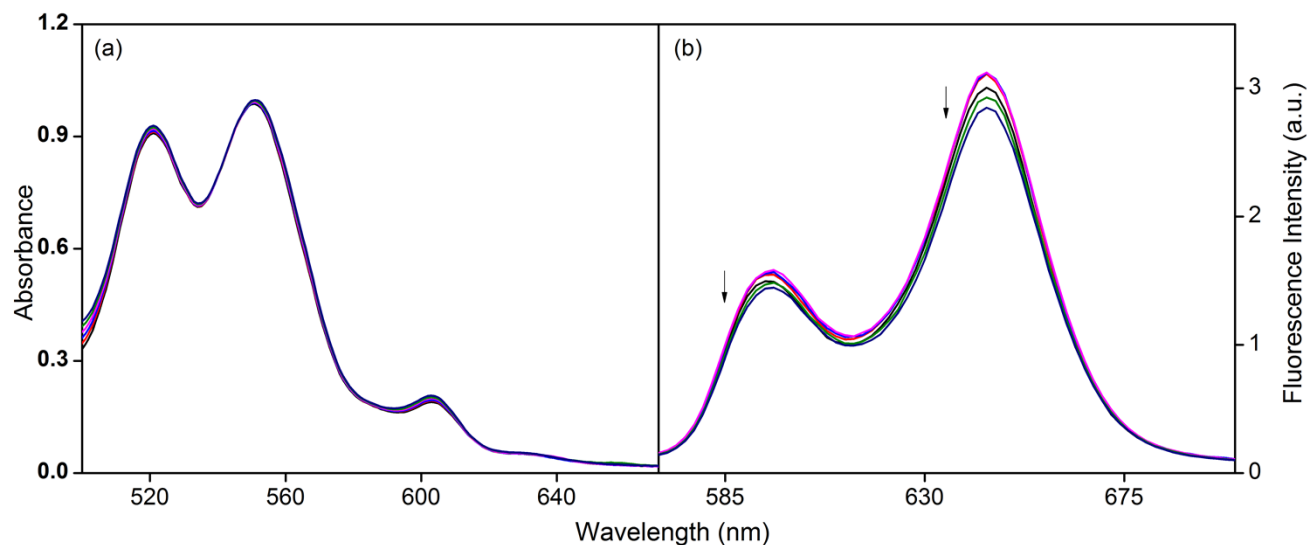

**Fig. S12** (a) Absorption titrations and (b) fluorescence titration of AlPor-Ph-AuPor<sup>+</sup> with TTF in dichloromethane. TTF was added up to  $1.88 \times 10^{-3}$  M in  $20 \mu\text{L}$  ( $2.22 \times 10^{-4}$  M) increments to 1 mL ( $6 \times 10^{-5}$  M) solution of dyad. The excitation wavelength was chosen at the isosbestic point, 555 nm, obtained from UV-visible titrations.

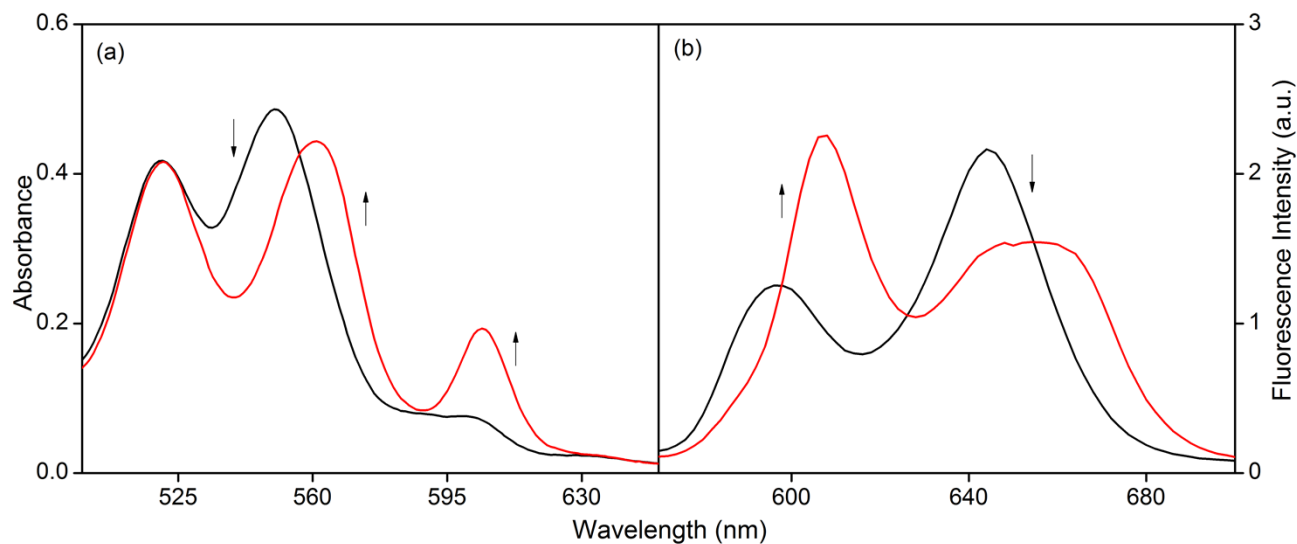

**Fig. S13** (a) Absorption titrations and (b) fluorescence titration of AlPor-Ph-AuPor<sup>+</sup> with py in dichloromethane. Pyridine was added up to  $3.80 \times 10^{-3}$  M to 1 mL ( $2.4 \times 10^{-5}$  M) solution of dyad. The excitation wavelength was chosen at the isosbestic point, 555 nm, obtained from UV-visible titrations.

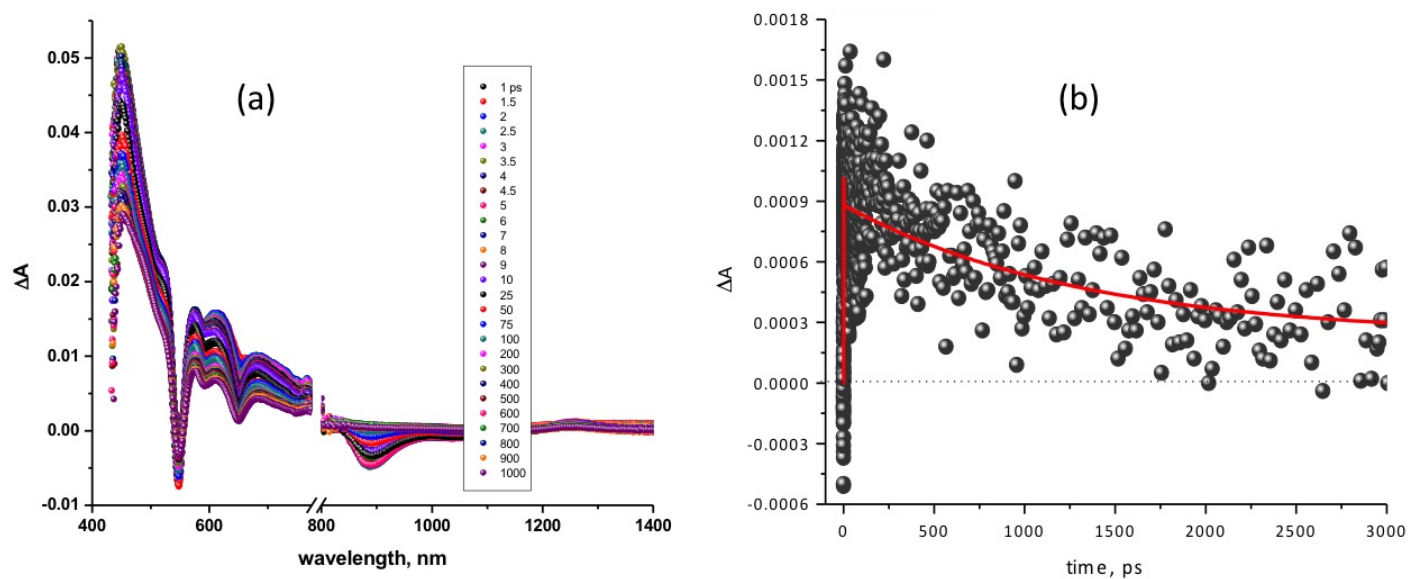

**Fig. S14** (a) Femtosecond transient absorption spectra and (b) decay profile at 1247 nm of AlPor-Ph in *o*-DCB.
